# Supplementary material
Source: publisher site journal article supplement (https://www.dovepress.com/get_supplementary_file.php?f=473226.docx)
Supplement: Supplementary file 1 [file get_supplementary_file.php]

| ICD-11 Codes | Description |
| --- | --- |
| 293 | Delirium due to conditions classified elsewhere |
| 293.1 | Subacute delirium |
| 292.81 | Drug-induced delirium |
| 290.11 | Presenile dementia with delirium |
| 290.3 | Senile dementia with delirium |
| 290.41 | Vascular dementia, with delirium |
| 291 | Alcohol withdrawal delirium |
| 293.9 | Unspecified transient mental disorder in conditions classified elsewhere |
| 780.09 | Other alteration of consciousness |
| 293.81 | Psychotic disorder with delusions in conditions classified elsewhere |
| 293.82 | Psychotic disorder with hallucinations in conditions classified elsewhere |
| 293.83 | Mood disorder in conditions classified elsewhere |
| 293.84 | Anxiety disorder in conditions classified elsewhere |
| 293.89 | Other specified transient mental disorders due to conditions classified elsewhere |

eTable 1. Diagnosis Codes for Delirium

eTable 2. Related search terms for Delirium

| SOC | HLGT | HLT | PT |
| --- | --- | --- | --- |
| psychiatric disorders | deliria (incl confusion) | deliria | Delirium(33598) |
|  |  |  | delirium tremens(470) |
|  |  |  | delirium febrile(118) |
|  |  |  | post-injection delirium sedation syndrome(783) |
|  |  |  | postoperative delirium(131) |
|  |  |  | intensive care unit delirium(30) |

eTable 3 ROR for delirium with gabapentinoids stratified by age.

| **Model** |  | **a** | | | **b** | | | **c** | | | **d** | | | **ROR(95%CI)** |
| --- | --- | --- | --- | --- | --- | --- | --- | --- | --- | --- | --- | --- | --- | --- |
|  |  | ≥65 | ＜65 | age unspecified | ≥65 | ＜65 | age unspecified | ≥65 | ＜65 | age unspecified | ≥65 | ＜65 | age unspecified |  |
| **Model 1** | **HLT** |  |  |  |  |  |  |  |  |  |  |  |  |  |
| deliria | 1345 | 1098 | 507 | 193081 | 1093435 | 214720 | 13064 | 47777 | 6469 | 3845178 | 6090245 | 7515327 | 0.51(0.49,0.53) |
| **PT** |  |  |  |  |  |  |  |  |  |  |  |  |  |
| delirium | 1327 | 1049 | 490 | 193099 | 1093484 | 214737 | 12867 | 11767 | 6098 | 3845375 | 6126171 | 7515698 | 1.09(1.05,1.13) |
| delirium tremens | 5 | 37 | 13 | 194421 | 1094496 | 215214 | 65 | 225 | 125 | 3858177 | 6134902 | 7521671 | 1.54(1.16,2.04) |
| delirium febrile | 2 | 5 | 2 | 194424 | 1094528 | 215225 | 33 | 58 | 18 | 3858209 | 6135023 | 7521778 | 0.96(0.49,1.90) |
| post-injection delirium sedation syndrome | 0 | 5 | 1 | 194426 | 1094528 | 215226 | 52 | 529 | 196 | 3858190 | 6134549 | 7521600 | 0.09(0.04,0.20) |
| postoperative delirium | 10 | 2 | 0 | 194416 | 1094531 | 215227 | 52 | 42 | 35 | 3858190 | 6135042 | 7521761 | 1.08(0.60,1.96) |
| intensive care unit delirium | 1 | 1 | 1 | 194425 | 1094532 | 215226 | 6 | 17 | 4 | 3858236 | 6135058 | 7521792 | 1.29(0.39,4.26) |
| **Model 2** | **HLT** |  |  |  |  |  |  |  |  |  |  |  |  |  |
| deliria | 339 | 170 | 82 | 24659 | 43566 | 17714 | 858 | 501 | 300 | 81427 | 133925 | 127380 | 1.42(1.29,1.56) |
| **PT** |  |  |  |  |  |  |  |  |  |  |  |  |  |
| delirium | 330 | 165 | 80 | 24668 | 43536 | 17716 | 846 | 469 | 274 | 81439 | 133976 | 127406 | 1.44(1.31,1.59) |
| delirium tremens | 3 | 3 | 2 | 24995 | 43733 | 17794 | 9 | 23 | 26 | 82276 | 133820 | 127654 | 0.55(0.26,1.15) |
| delirium febrile | 0 | 1 | 0 | 24998 | 43735 | 17796 | 0 | 1 | 0 | 82285 | 133835 | 127680 | 3.97(0.25,63.53) |
| post-injection delirium sedation syndrome | 0 | 1 | 0 | 24998 | 43735 | 17796 | 0 | 0 | 0 | 82285 | 133836 | 127680 |  |
| postoperative delirium | 6 | 0 | 0 | 24992 | 43736 | 17796 | 3 | 9 | 0 | 82282 | 133832 | 127680 | 1.99(0.75,5.29) |
| intensive care unit delirium | 0 | 0 | 0 | 24998 | 43736 | 17796 | 0 | 0 | 0 | 82285 | 133835 | 127680 |  |
| **Model 3** | **HLT** |  |  |  |  |  |  |  |  |  |  |  |  |  |
| deliria | 333 | 167 | 82 | 24641 | 43543 | 17709 | 832 | 489 | 299 | 81355 | 133865 | 127362 | 1.43(1.30,1.58) |
| **PT** |  |  |  |  |  |  |  |  |  |  |  |  |  |
| delirium | 324 | 163 | 80 | 24650 | 43547 | 17711 | 820 | 456 | 273 | 81367 | 133883 | 127388 | 1.46(1.33,1.61) |
| delirium tremens | 3 | 3 | 2 | 24971 | 43707 | 17789 | 9 | 23 | 26 | 82178 | 133757 | 127635 | 0.55(0.26,1.15) |
| delirium febrile | 0 | 0 | 0 | 24974 | 43710 | 17791 | 0 | 1 | 0 | 82187 | 133771 | 127661 |  |
| post-injection delirium sedation syndrome | 0 | 1 | 0 | 24974 | 43709 | 17791 | 0 | 0 | 0 | 82187 | 133773 | 127661 |  |
| postoperative delirium | 6 | 0 | 0 | 24968 | 43710 | 17791 | 3 | 9 | 0 | 82184 | 133769 | 127661 | 1.99(0.75,5.29) |
| intensive care unit delirium | 0 | 0 | 0 | 24974 | 43710 | 17791 | 0 | 0 | 0 | 82187 | 133772 | 127661 |  |
| **Model 4** | **HLT** |  |  |  |  |  |  |  |  |  |  |  |  |  |
| deliria | 66 | 47 | 27 | 10060 | 15206 | 5419 | 742 | 379 | 194 | 92788 | 115172 | 75150 | 0.98(0.82,1.17) |
| **PT** |  | 0 |  |  |  |  |  |  |  |  |  |  |  |
| delirium | 65 | 44 | 27 | 10061 | 15209 | 5419 | 726 | 367 | 187 | 92804 | 115180 | 75157 | 0.98(0.82,1.17) |
| delirium tremens | 1 | 3 | 0 | 10125 | 15277 | 5419 | 8 | 8 | 7 | 93522 | 115407 | 75337 | 1.60(0.55,4.64) |
| delirium febrile | 0 | 0 | 0 | 10126 | 15253 | 5446 | 0 | 1 | 0 | 93530 | 115410 | 75344 |  |
| post-injection delirium sedation syndrome | 0 | 0 | 0 | 10126 | 15253 | 5446 | 0 | 1 | 0 | 93530 | 115410 | 75344 |  |
| postoperative delirium | 0 | 0 | 0 | 10126 | 15253 | 5446 | 8 | 3 | 0 | 93522 | 115408 | 75344 |  |
| intensive care unit delirium | 0 | 0 | 0 | 10126 | 15253 | 5446 | 0 | 0 | 0 | 93530 | 115411 | 75344 |  |

eTable 4 ROR for delirium with gabapentinoids stratified by sex.

| **Model** |  | **a** | | **b** | | **c** | | **d** | | **female** | **male** |
| --- | --- | --- | --- | --- | --- | --- | --- | --- | --- | --- | --- |
|  |  | male | female | male | female | male | female | male | female | 95%CI | 95%CI |
| **Model 1** | **HLT** |  |  |  |  |  |  |  |  |  |  |
| deliria | 1311 | 1403 | 237678 | 434739 | 15676 | 13575 | 6448864 | 9807025 | 2.33(2.21,2.46) | 2.27(2.14,2.40) |
| **PT** |  |  |  |  |  |  |  |  |  |  |
| delirium | 1254 | 1378 | 237735 | 434764 | 14830 | 13197 | 6449710 | 9807403 | 2.35(2.232.49) | 2.29(2.17,2.43) |
| delirium tremens | 45 | 9 | 238944 | 436133 | 264 | 126 | 6464276 | 9820474 | 1.61(0.82,3.16) | 4.61(3.36,6.33) |
| delirium febrile | 0 | 9 | 238989 | 436133 | 60 | 39 | 6464480 | 9820561 | 5.19(2.52,10.72) |  |
| post-injection delirium sedation syndrome | 3 | 2 | 238986 | 436140 | 501 | 159 | 6464039 | 9820441 | 0.28(0.07,1.14) | 0.16(0.05,0.50) |
| postoperative delirium | 10 | 2 | 238979 | 436140 | 57 | 46 | 6464483 | 9820554 | 0.97(0.24,4.03) | 4.74(2.42,9.29) |
| intensive care unit delirium | 0 | 3 | 238989 | 436139 | 6 | 20 | 6464534 | 9820580 | 3.38(1.00,11.37) |  |
| **Model 2** | **HLT** |  |  |  |  |  |  |  |  |  |  |
| deliria | 216 | 319 | 27998 | 53379 | 736 | 802 | 116066 | 179085 | 1.33(1.17,1.51) | 1.21(1.04,1.42) |
| PT |  |  |  |  |  |  |  |  |  |  |
| delirium | 204 | 316 | 28010 | 53382 | 690 | 779 | 116112 | 179108 | 1.36(1.19,1.55) | 1.23(1.05,1.43) |
| delirium tremens | 5 | 2 | 28209 | 53696 | 43 | 14 | 116759 | 179873 | 0.48(0.11,2.10) | 0.48(0.19,1.22) |
| delirium febrile | 0 | 1 | 28214 | 53697 | 0 | 1 | 116802 | 179886 | 3.35(0.21,53.56) |  |
| post-injection delirium sedation syndrome | 1 | 0 | 28213 | 53698 | 0 | 0 | 116802 | 179887 |  |  |
| postoperative delirium | 6 | 0 | 28208 | 53698 | 3 | 9 | 116799 | 179878 |  | 8.28(2.07,33.11) |
| intensive care unit delirium | 0 | 0 | 28214 | 53698 | 0 | 0 | 116802 | 179887 |  |  |
| **Model 3** | **HLT** |  |  |  |  |  |  |  |  |  |  |
| deliria | 214 | 312 | 27962 | 53373 | 711 | 787 | 115978 | 179040 | 1.33(1.17,1.52) | 1.25(1.07,1.46) |
| **PT** |  |  |  |  |  |  |  |  |  |  |
| delirium | 202 | 310 | 27974 | 53375 | 665 | 764 | 116024 | 179063 | 1.36(1.19,1.55) | 1.26(1.08,1.48) |
| delirium tremens | 5 | 2 | 28171 | 53683 | 43 | 14 | 116646 | 179813 | 0.47(0.11,2.10) | 0.48(0.19,1.22) |
| delirium febrile | 0 | 0 | 28176 | 53685 | 0 | 1 | 116689 | 179826 |  |  |
| post-injection delirium sedation syndrome | 1 | 0 | 28175 | 53685 | 0 | 0 | 116689 | 179827 |  |  |
| postoperative delirium | 6 | 0 | 28170 | 53685 | 3 | 9 | 116686 | 179818 |  | 8.28(2.07,33.23) |
| intensive care unit delirium | 0 | 0 | 28176 | 53685 | 0 | 0 | 116689 | 179827 |  |  |
| **Model 4** | **HLT** |  |  |  |  |  |  |  |  |  |  |
| deliria | 64 | 53 | 8965 | 20052 | 509 | 686 | 106948 | 185278 | 0.71(0.53,0.94) | 1.50(1.16,1.95) |
| **PT** |  |  |  |  |  |  |  |  |  |  |
| delirium | 62 | 51 | 8967 | 20054 | 480 | 681 | 106977 | 185283 | 0.69(0.52,0.92) | 1.54(1.18,2.01) |
| delirium tremens | 2 | 2 | 9027 | 20103 | 20 | 2 | 107437 | 185962 | 9.25(1.30,65.67) | 1.19(0.28,5.09) |
| delirium febrile | 0 | 0 | 9029 | 20105 | 0 | 1 | 107457 | 185963 |  |  |
| post-injection delirium sedation syndrome | 0 | 0 | 9029 | 20105 | 1 | 0 | 107456 | 185964 |  |  |
| postoperative delirium | 0 | 0 | 9029 | 20105 | 8 | 3 | 107449 | 185961 |  |  |
| intensive care unit delirium | 0 | 0 | 9029 | 20105 | 0 | 0 | 107457 | 185964 |  |  |


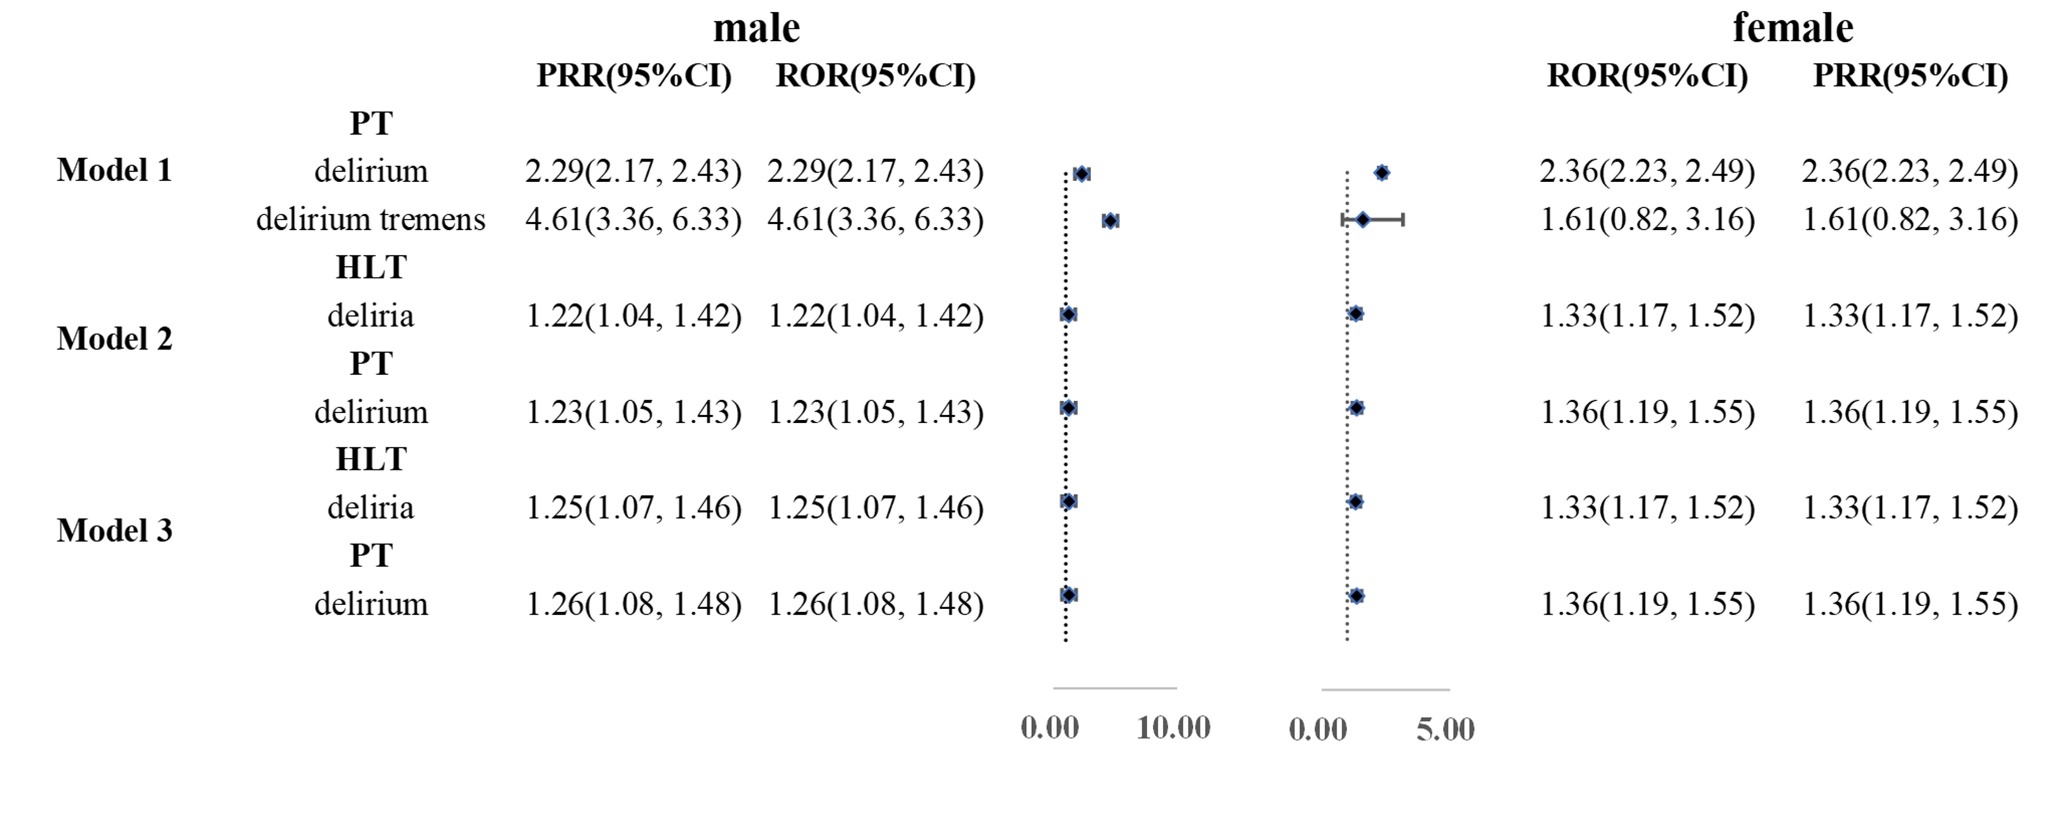


e Figure 1 Delirium ROR and PRR of gabapentinoids versus non-gabapentinoids were stratified by sex.
